# Supplementary material
Source: ML conference proceedings conference paper supplement (https://proceedings.mlr.press/v51/roy16.html)
Supplement: Supplementary file 1 [file roy16-supp.pdf]

## A COMPLETE PROOF OF THEOREM 2

In what follows, we assume an arbitrary set  $\mathcal{H}$  of classifiers and distributions  $P$  and  $Q$  on  $\mathcal{H}$ . When  $\mathcal{H}$  is a discrete set,  $P(h)$  and  $Q(h)$  denote probability masses at  $h$ . When  $\mathcal{H}$  is continuous,  $P(h)$  and  $Q(h)$  denote the probability densities at  $h$  associated to  $P$  and  $Q$  when they exist.

Let us first recall the change of measure inequality, which is an important step in most PAC-Bayesian proofs.

**Lemma 1** (Change of measure inequality [Seldin and Tishby, 2010, McAllester, 2013]). *Let  $\mathcal{H}$  be a set of classifiers and let  $P$  be a distribution on  $\mathcal{H}$ . Let  $Q$  be a distribution on  $\mathcal{H}$  with a support entirely contained within the support of  $P$ . Then for any function  $\phi : \mathcal{H} \rightarrow \mathbb{R}$  measurable with respect to  $P$ , we have*

$$\ln \left( \mathbf{E}_{h \sim P} \exp [\phi(h)] \right) \geq \mathbf{E}_{h \sim Q} \phi(h) - \text{KL}(Q \| P).$$

*Proof.* This proof is very similar to the proofs of Seldin and Tishby [2010], McAllester [2013], but we provide it for completeness.

Given  $\mathcal{H}$ , let  $\mathcal{H}_P \subseteq \mathcal{H}$  denote the support of  $P$  and  $\mathcal{H}_Q \subseteq \mathcal{H}_P$  denote the support of  $Q$ . In the continuous case, for any  $h \in \mathcal{H}_Q$ , we have that  $P(h)/Q(h) = dP(h)/dQ(h)$ ; which is the Radon-Nykodym derivative. Hence, for any  $\psi : \mathcal{H} \rightarrow \mathbb{R}$  measurable with respect to  $P$  and  $Q$ , we have

$$\mathbf{E}_{h \sim P} \psi(h) = \int_{\mathcal{H}_P} \psi(h) dP(h) \geq \int_{\mathcal{H}_Q} \psi(h) dP(h) = \int_{\mathcal{H}_Q} \frac{dP(h)}{dQ(h)} \psi(h) dQ(h) = \int_{\mathcal{H}_Q} \frac{P(h)}{Q(h)} \psi(h) dQ(h) \triangleq \mathbf{E}_{h \sim Q} \frac{P(h)}{Q(h)} \psi(h).$$

The same result holds trivially in the discrete case. This gives us the rule of how to transform the expectation over  $P$  to an expectation over  $Q$ . By using Jensen's inequality and by exploiting the concavity of  $\ln(\cdot)$ , we then obtain

$$\begin{aligned} \ln \left( \mathbf{E}_{h \sim P} \exp [\phi(h)] \right) &\geq \ln \left( \mathbf{E}_{h \sim Q} \exp [\phi(h)] \frac{P(h)}{Q(h)} \right) \\ &\geq \mathbf{E}_{h \sim Q} \ln \left( \exp [\phi(h)] \frac{P(h)}{Q(h)} \right) \\ &= \mathbf{E}_{h \sim Q} \left[ \phi(h) - \ln \left( \frac{Q(h)}{P(h)} \right) \right] \\ &= \mathbf{E}_{h \sim Q} \phi(h) - \text{KL}(Q \| P). \end{aligned} \quad \square$$

We also need the following modified version of this lemma, which takes into account pairs of voters.

**Lemma 2** (Change of measure inequality for pairs of voters [Germain et al., 2015]). *For any set  $\mathcal{H}$ , for any distributions  $P$  and  $Q$  on  $\mathcal{H}$ , and for any measurable function  $\phi : \mathcal{H} \times \mathcal{H} \rightarrow \mathbb{R}$ , we have*

$$\ln \left( \mathbf{E}_{(h, h') \sim P^2} \exp [\phi(h, h')] \right) \geq \mathbf{E}_{(h, h') \sim Q^2} \phi(h, h') - 2\text{KL}(Q \| P).$$

*Proof.* This result is an application of Lemma 1, with  $P = P^2$ ,  $Q = Q^2$ , together with the observation that  $\text{KL}(Q^2 \| P^2) = 2\text{KL}(Q \| P)$  (see the definition of the KL-divergence, Definition 2).  $\square$

Now, let us first define the Kullback-Leibler divergence between two Bernoulli distributions, which will be used in the proof of Theorems 3 and 4, below.

**Definition 3.** *The Kullback-Leibler divergence between two Bernoulli distributions with probability of success  $q$  and probability of success  $p$  is given by*

$$\text{kl}(q \| p) \triangleq q \ln \frac{q}{p} + (1 - q) \ln \frac{1 - q}{1 - p}.$$

To prove Theorem 2 that relies on an upper bound on the first moment of the margin and a lower bound on the second moment, we will first prove these two bounds independently. The first provides a lower bound on the first moment of the margin from its empirical estimate, and is very similar to the classical PAC-Bayesian bounds on the risk of the stochastic Gibbs classifier, which can be recovered with a linear transformation of the first moment of the margin:  $R_{D'}(G_Q) = \frac{1}{2} (1 - \mu_1(M_Q^{D'}))$ .

**Theorem 3.** *For any distribution  $D$  on  $\mathcal{X} \times \mathcal{Y}$ , for any set  $\mathcal{H}$  of real-valued voters  $h : \mathcal{X} \rightarrow [-1, 1]$ , for any prior distribution  $P$  on  $\mathcal{H}$ , and any  $\delta \in (0, 1]$ , we have*

$$\Pr_{S \sim D^m} \left( \begin{array}{l} \forall Q \text{ on } \mathcal{H}, \\ \mu_1(M_Q^D) \geq \mu_1(M_Q^S) - \sqrt{\frac{2}{m} \left[ \text{KL}(Q \| P) + \ln \left( \frac{2\sqrt{m}}{\delta} \right) \right]} \end{array} \right) \geq 1 - \delta.$$

*Proof.* Given a voter  $h : \mathcal{X} \rightarrow [-1, 1]$  and a distribution  $D'$  on  $\mathcal{X} \times \mathcal{Y}$ , let  $M_h^{D'} \triangleq \mathbf{E}_{(x,y) \sim D'} y \cdot h(x)$ .

First, note that  $\mathbf{E}_{h \sim P} \exp \left[ \frac{m}{2} (M_h^S - M_h^D)^2 \right]$  is a non-negative random variable. By applying Markov's inequality, with probability at least  $1 - \delta$  over the choice of  $S \sim D^m$ , we have

$$\mathbf{E}_{h \sim P} \exp \left[ \frac{m}{2} (M_h^S - M_h^D)^2 \right] \leq \frac{1}{\delta} \mathbf{E}_{S \sim D^m} \mathbf{E}_{h \sim P} \exp \left[ \frac{m}{2} (M_h^S - M_h^D)^2 \right]. \quad (7)$$

Let us now upper-bound the right-hand side of the inequality:

$$\mathbf{E}_{S \sim D^m} \mathbf{E}_{h \sim P} \exp \left[ \frac{m}{2} (M_h^S - M_h^D)^2 \right] = \mathbf{E}_{h \sim P} \mathbf{E}_{S \sim D^m} \exp \left[ \frac{m}{2} (M_h^S - M_h^D)^2 \right] \quad (8)$$

$$= \mathbf{E}_{h \sim P} \mathbf{E}_{S \sim D^m} \exp \left[ m \cdot 2 \left( \frac{1}{2} (1 - M_h^S) - \frac{1}{2} (1 - M_h^D) \right)^2 \right] \\ \leq \mathbf{E}_{h \sim P} \mathbf{E}_{S \sim D^m} \exp \left[ m \cdot \text{kl} \left( \frac{1}{2} (1 - M_h^S) \parallel \frac{1}{2} (1 - M_h^D) \right) \right] \quad (9)$$

$$\leq \mathbf{E}_{h \sim P} 2\sqrt{m} = 2\sqrt{m}, \quad (10)$$

where Line (8) comes from the fact that  $P$  is independent of  $S$ , Line (9) is an application of Pinsker's inequality  $2(q - p)^2 \leq \text{kl}(q \| p)$ , and Line (10) is an application of the main result of Maurer [2004], which is valid for arbitrary random variables which lie within  $[0, 1]$ .

Now, by applying Line 10 in Inequality (7) and by taking the logarithm on each side, with probability at least  $1 - \delta$  over the choice of  $S \sim D^m$ , we have

$$\ln \left( \mathbf{E}_{h \sim P} \exp \left[ \frac{m}{2} (M_h^S - M_h^D)^2 \right] \right) \leq \ln \left( \frac{2\sqrt{m}}{\delta} \right).$$

By applying the change of measure inequality of Lemma 1 on the left-hand side of the inequality with  $\phi(h) = \frac{m}{2} (M_h^S - M_h^D)^2$ , and by using Jensen's inequality exploiting the convexity of  $\frac{m}{2} (M_h^S - M_h^D)^2$ , we obtain that for all distributions  $Q$  on  $\mathcal{H}$ ,

$$\begin{aligned} \ln \left( \mathbf{E}_{h \sim P} \exp \left[ \frac{m}{2} (M_h^S - M_h^D)^2 \right] \right) &\geq \mathbf{E}_{h \sim Q} \frac{m}{2} (M_h^S - M_h^D)^2 - \text{KL}(Q \| P) \\ &\geq \frac{m}{2} \left( \mathbf{E}_{h \sim Q} M_h^S - \mathbf{E}_{h \sim Q} M_h^D \right)^2 - \text{KL}(Q \| P) \\ &= \frac{m}{2} (\mu_1(M_Q^S) - \mu_1(M_Q^D))^2 - \text{KL}(Q \| P) \end{aligned}$$

We then have that with probability at least  $1 - \delta$  over the choice of  $S \sim D^m$ , for all  $Q$  on  $\mathcal{H}$ ,

$$\frac{m}{2} (\mu_1(M_Q^S) - \mu_1(M_Q^D))^2 - \text{KL}(Q \| P) \leq \ln \left( \frac{2\sqrt{m}}{\delta} \right).$$

The result immediately follows.  $\square$

The second result provides an upper bound on the second moment of the margin from its empirical estimate. It requires techniques provided in Lacasse et al. [2006], Laviolette et al. [2011], Germain et al. [2011] which are less common in the PAC-Bayesian literature as they make use of random variables considering pairs of voters.

**Theorem 4.** *For any distribution  $D$  on  $\mathcal{X} \times \mathcal{Y}$ , for any set  $\mathcal{H}$  of real-valued voters  $h : \mathcal{X} \rightarrow [-1, 1]$ , for any prior distribution  $P$  on  $\mathcal{H}$ , and any  $\delta \in (0, 1]$ , we have*

$$\Pr_{S \sim D^m} \left( \forall Q \text{ on } \mathcal{H}, \mu_2(M_Q^D) \leq \mu_2(M_Q^S) + \sqrt{\frac{2}{m} \left[ 2\text{KL}(Q\|P) + \ln \left( \frac{2\sqrt{m}}{\delta} \right) \right]} \right) \geq 1 - \delta.$$

*Proof.* Given a voter  $h : \mathcal{X} \rightarrow [-1, 1]$  and a distribution  $D'$  on  $\mathcal{X} \times \mathcal{Y}$ , let  $M_{h,h'}^{D'} \triangleq \mathbf{E}_{(x,y) \sim D'} h(x) h'(x)$ .

First, note that  $\mathbf{E}_{(h,h') \sim P^2} \exp \left[ \frac{m}{2} (M_{h,h'}^S - M_{h,h'}^D)^2 \right]$  is a non-negative random variable. By applying Markov's inequality, with probability at least  $1 - \delta$  over the draws of  $S \sim D^m$ , we have

$$\mathbf{E}_{(h,h') \sim P^2} \exp \left[ \frac{m}{2} (M_{h,h'}^S - M_{h,h'}^D)^2 \right] \leq \frac{1}{\delta} \mathbf{E}_{S \sim D^m} \mathbf{E}_{(h,h') \sim P^2} \exp \left[ \frac{m}{2} (M_{h,h'}^S - M_{h,h'}^D)^2 \right]. \quad (11)$$

Let us now upper-bound the right-hand side of the last inequality:

$$\mathbf{E}_{S \sim D^m} \mathbf{E}_{(h,h') \sim P^2} \exp \left[ \frac{m}{2} (M_{h,h'}^S - M_{h,h'}^D)^2 \right] = \mathbf{E}_{(h,h') \sim P^2} \mathbf{E}_{S \sim D^m} \exp \left[ \frac{m}{2} (M_{h,h'}^S - M_{h,h'}^D)^2 \right] \quad (12)$$

$$= \mathbf{E}_{(h,h') \sim P^2} \mathbf{E}_{S \sim D^m} \exp \left[ m \cdot 2 \left( \frac{1}{2} (1 - M_{h,h'}^S) - \frac{1}{2} (1 - M_{h,h'}^D) \right)^2 \right] \\ \leq \mathbf{E}_{(h,h') \sim P^2} \mathbf{E}_{S \sim D^m} \exp \left[ m \cdot \text{kl} \left( \frac{1}{2} (1 - M_{h,h'}^S) \parallel \frac{1}{2} (1 - M_{h,h'}^D) \right) \right] \quad (13)$$

$$\leq \mathbf{E}_{(h,h') \sim P^2} 2\sqrt{m} = 2\sqrt{m}, \quad (14)$$

where Line (12) comes from the fact that distribution  $P$  is independent of  $S$ , Line (13) is an application of Pinsker's inequality  $2(q - p)^2 \leq \text{kl}(q\|p)$ , and Line (14) is an application of the main result of Maurer [2004], which is valid for arbitrary random variables which lie within  $[0, 1]$ .

Now, by applying Line (14) in Inequality (11) and by taking the logarithm on each side, with probability at least  $1 - \delta$  over the draws of  $S \sim D^m$ , we have

$$\ln \left( \mathbf{E}_{(h,h') \sim P^2} \exp \left[ \frac{m}{2} (M_{h,h'}^S - M_{h,h'}^D)^2 \right] \right) \leq \ln \left( \frac{2\sqrt{m}}{\delta} \right).$$

We now apply the change of measure inequality of Lemma 2 on the left-hand side of the inequality, with  $\phi(h, h') = \frac{m}{2} (M_{h,h'}^S - M_{h,h'}^D)^2$ . We then use Jensen's inequality exploiting the convexity of  $\frac{m}{2} (M_{h,h'}^S - M_{h,h'}^D)^2$ . We obtain that for all distributions  $Q$  on  $\mathcal{H}$ ,

$$\ln \left( \mathbf{E}_{(h,h') \sim P^2} \exp \left[ \frac{m}{2} (M_{h,h}^S - M_{h,h'}^D)^2 \right] \right) \geq \mathbf{E}_{(h,h') \sim Q^2} \frac{m}{2} (M_{h,h}^S - M_{h,h'}^D)^2 - 2\text{KL}(Q\|P) \\ \geq \frac{m}{2} \left( \mathbf{E}_{(h,h') \sim Q^2} M_{h,h}^S - \mathbf{E}_{(h,h') \sim Q^2} M_{h,h'}^D \right)^2 - 2\text{KL}(Q\|P) \\ = \frac{m}{2} (\mu_2(M_Q^S) - \mu_2(M_Q^D))^2 - 2\text{KL}(Q\|P).$$

We then have that with probability at least  $1 - \delta$  over the draws of  $S \sim D^m$ ,

$$\forall Q \text{ on } \mathcal{H}, \quad \frac{m}{2} (\mu_2(M_Q^S) - \mu_2(M_Q^D))^2 - 2\text{KL}(Q\|P) \leq \ln \left( \frac{2\sqrt{m}}{\delta} \right).$$

The result then immediately follows.  $\square$

## B DETAILED CALCULATIONS OF THE LAGRANGIAN DUALITY

**Partial derivative for getting from Lagrangian (4) to first optimality constraint (5).** The result is obtained by making the last line equal to  $\mathbf{0}$  and by isolating  $-\xi + \nu \mathbf{1}$ .

$$\begin{aligned}
 & \frac{\partial}{\partial \mathbf{q}^*} \Lambda(\mathbf{q}^*, \gamma^*, \alpha, \beta, \xi, \nu) \\
 &= \frac{\partial}{\partial \mathbf{q}^*} \left[ \frac{1}{m} \gamma^{*\top} \gamma^* + \alpha^\top (\gamma^* - \text{diag}(\mathbf{y}) \mathbf{H} \mathbf{q}^*) + \beta \left( \frac{1}{m} \mathbf{1}^\top \gamma^* - \mu \right) - \xi^\top \mathbf{q}^* + \nu (\mathbf{1}^\top \mathbf{q}^* - 1) \right] \\
 &= \frac{\partial}{\partial \mathbf{q}^*} \left[ \alpha^\top (\gamma^* - \text{diag}(\mathbf{y}) \mathbf{H} \mathbf{q}^*) - \xi^\top \mathbf{q}^* + \nu \mathbf{1}^\top \mathbf{q}^* - \nu \right] \\
 &= \frac{\partial}{\partial \mathbf{q}^*} \left[ \alpha^\top \gamma^* - \frac{1}{m} \alpha^\top \text{diag}(\mathbf{y}) \mathbf{H} \mathbf{q}^* - \xi^\top \mathbf{q}^* + \nu \mathbf{1}^\top \mathbf{q}^* \right] \\
 &= \frac{\partial}{\partial \mathbf{q}^*} \left[ -\alpha^\top \text{diag}(\mathbf{y}) \mathbf{H} \mathbf{q}^* - \xi^\top \mathbf{q}^* + \nu \mathbf{1}^\top \mathbf{q}^* \right] \\
 &= -\mathbf{H}^\top \text{diag}(\mathbf{y}) \alpha - \xi + \nu \mathbf{1}
 \end{aligned}$$

**Partial derivative for getting from Lagrangian (4) to second optimality constraint (5).** The result is obtained by making the last line equal to  $\mathbf{0}$  and by isolating  $\gamma^*$ .

$$\begin{aligned}
 & \frac{\partial}{\partial \gamma^*} \Lambda(\mathbf{q}^*, \gamma^*, \alpha, \beta, \xi, \nu) \\
 &= \frac{\partial}{\partial \gamma^*} \left[ \frac{1}{m} \gamma^{*\top} \gamma^* + \alpha^\top (\gamma^* - \text{diag}(\mathbf{y}) \mathbf{H} \mathbf{q}^*) + \beta \left( \frac{1}{m} \mathbf{1}^\top \gamma^* - \mu \right) - \xi^\top \mathbf{q}^* + \nu (\mathbf{1}^\top \mathbf{q}^* - 1) \right] \\
 &= \frac{\partial}{\partial \gamma^*} \left[ \frac{1}{m} \gamma^{*\top} \gamma^* + \alpha^\top \gamma^* - \alpha^\top \text{diag}(\mathbf{y}) \mathbf{H} \mathbf{q}^* + \frac{\beta}{m} \mathbf{1}^\top \gamma^* - \beta \mu - \xi^\top \mathbf{q}^* + \nu \mathbf{1}^\top \mathbf{q}^* - \nu \right] \\
 &= \frac{\partial}{\partial \gamma^*} \left[ \frac{1}{m} \gamma^{*\top} \gamma^* + \alpha^\top \gamma^* + \frac{\beta}{m} \mathbf{1}^\top \gamma^* \right] \\
 &= \frac{2}{m} \gamma^* + \alpha + \frac{\beta}{m} \mathbf{1}
 \end{aligned}$$

**Straightforward calculations details for substituting Equation (5) in Lagrangian (4).**

$$\begin{aligned}
 & \Lambda(\mathbf{q}^*, \gamma^*, \alpha, \beta, \xi, \nu) \\
 &= \frac{1}{m} \gamma^{*\top} \gamma^* + \alpha^\top (\gamma^* - \text{diag}(\mathbf{y}) \mathbf{H} \mathbf{q}^*) + \beta \left( \frac{1}{m} \mathbf{1}^\top \gamma^* - \mu \right) - \xi^\top \mathbf{q}^* + \nu (\mathbf{1}^\top \mathbf{q}^* - 1) \\
 &= \frac{1}{m} \gamma^{*\top} \gamma^* + \alpha^\top \gamma^* - \alpha^\top \text{diag}(\mathbf{y}) \mathbf{H} \mathbf{q}^* + \frac{\beta}{m} \mathbf{1}^\top \gamma^* - \beta \mu - \xi^\top \mathbf{q}^* + \nu \mathbf{1}^\top \mathbf{q}^* - \nu \\
 &= \frac{1}{m} \gamma^{*\top} \gamma^* + \alpha^\top \gamma^* - (\mathbf{H}^\top \text{diag}(\mathbf{y}) \alpha)^\top \mathbf{q}^* + \frac{\beta}{m} \mathbf{1}^\top \gamma^* - \beta \mu - (\xi + \nu \mathbf{1})^\top \mathbf{q}^* - \nu \\
 &= \frac{1}{m} \gamma^{*\top} \gamma^* + \alpha^\top \gamma^* + (\xi + \nu \mathbf{1})^\top \mathbf{q}^* + \frac{\beta}{m} \mathbf{1}^\top \gamma^* - \beta \mu - (\xi + \nu \mathbf{1})^\top \mathbf{q}^* - \nu && \langle \text{First substitution using Eq. (5)} \rangle \\
 &= \frac{1}{m} \gamma^{*\top} \gamma^* + \alpha^\top \gamma^* + \frac{\beta}{m} \mathbf{1}^\top \gamma^* - \beta \mu - \nu && \langle \text{Simplification} \rangle \\
 &= \left( \frac{1}{m} \gamma^* + \alpha + \frac{\beta}{m} \mathbf{1} \right)^\top \gamma^* - \beta \mu - \nu \\
 &= \left( \frac{1}{m} \left( -\frac{m}{2} \alpha - \frac{\beta}{2} \mathbf{1} \right) + \alpha + \frac{\beta}{m} \mathbf{1} \right)^\top \left( -\frac{m}{2} \alpha - \frac{\beta}{2} \mathbf{1} \right) - \beta \mu - \nu && \langle \text{Second substitution using Eq. (5)} \rangle \\
 &= \left( -\frac{1}{2} \alpha - \frac{\beta}{2m} \mathbf{1} + \alpha + \frac{\beta}{m} \mathbf{1} \right)^\top \left( -\frac{m}{2} \alpha - \frac{\beta}{2} \mathbf{1} \right) - \beta \mu - \nu \\
 &= \left( \frac{1}{2} \alpha + \frac{\beta}{2m} \mathbf{1} \right)^\top \left( -\frac{m}{2} \alpha - \frac{\beta}{2} \mathbf{1} \right) - \beta \mu - \nu \\
 &= -\frac{m}{4} \alpha^\top \alpha - \frac{\beta}{4} \alpha^\top \mathbf{1} - \frac{\beta}{4} \mathbf{1}^\top \alpha - \frac{\beta^2}{4m} \mathbf{1}^\top \mathbf{1} - \beta \mu - \nu \\
 &= -\frac{m}{4} \alpha^\top \alpha - \frac{\beta}{2} \mathbf{1}^\top \alpha - \frac{\beta^2}{4} - \beta \mu - \nu
 \end{aligned}$$

## C RESULTS USING RBF KERNELS AS VOTERS

Table 2 below shows the results of the experiments considering RBF kernels as base voters. In this setting, for each training example  $(x, y)$ , we consider the voters  $h(\cdot) = \pm K(x, \cdot)$ , where  $K(x, x') \triangleq \exp(-\|x - x'\|^2/2\sigma^2)$ , where  $\sigma$  is the width parameter of the kernel and is set to the mean squared distance between pairs of training examples.

Again, the hyperparameter value of each algorithm has been selected by 5-folds cross-validation on the training set, among 15 values on a logarithmic scale. The value of hyperparameter  $\mu$  of CqBoost and MinCq is selected among values between  $10^{-5}$  and  $10^{-2}$ . The value of hyperparameter  $D$  of MDBoost is chosen between  $10^2$  and  $10^6$ . The value of hyperparameter  $C$  of LPBoost and CG-Boost is selected among values between  $10^{-3}$  and  $10^3$ . The number of iterations of AdaBoost is selected among values between  $10^3$  and  $10^7$ . The value of hyperparameter  $C$  of SVM has been chosen between  $10^{-4}$  and  $10^4$ . The stopping criterion additive constant  $\epsilon$  of all column generation algorithms has been set to  $10^{-8}$ .

|            | CqBoost       |            | MDBoost       |            | LPBoost       |            | CG-Boost     |       | AdaBoost |       | MinCq  |       | SVM    |       |
|------------|---------------|------------|---------------|------------|---------------|------------|--------------|-------|----------|-------|--------|-------|--------|-------|
| Dataset    | Risk          | Cols.      | Risk          | Cols.      | Risk          | Cols.      | Risk         | Cols. | Risk     | Cols. | Risk   | Cols. | Risk   | Cols. |
| australian | 0.142         | <b>31*</b> | 0.151         | 62         | 0.145         | 71         | <b>0.136</b> | 345   | 0.157    | 46    | 0.128* | 690   | 0.133  | 218   |
| balance    | 0.054         | 25         | 0.038         | 89         | <b>0.029*</b> | <b>23*</b> | 0.032        | 313   | 0.032    | 23*   | 0.058  | 624   | 0.035  | 37    |
| breast     | <b>0.040</b>  | 35         | <b>0.040</b>  | 33         | <b>0.040</b>  | <b>4*</b>  | <b>0.040</b> | 350   | 0.040    | 10    | 0.037* | 700   | 0.040  | 51    |
| bupa       | <b>0.272*</b> | 30         | 0.277         | <b>23*</b> | 0.295         | 39         | 0.283        | 174   | 0.283    | 37    | 0.295  | 344   | 0.272* | 110   |
| car        | 0.094         | <b>32*</b> | 0.054         | 169        | <b>0.034*</b> | 87         | 0.197        | 504   | 0.268    | 74    | 0.302  | 1000  | 0.034* | 97    |
| cmc        | 0.317         | <b>28*</b> | <b>0.312</b>  | 39         | 0.323         | 30         | 0.322        | 501   | 0.312    | 50    | 0.316  | 1000  | 0.306* | 323   |
| credit     | 0.133         | <b>21*</b> | <b>0.130*</b> | 137        | 0.139         | 73         | 0.133        | 345   | 0.145    | 62    | 0.133  | 690   | 0.130* | 118   |
| cylinder   | 0.307         | 36         | <b>0.296</b>  | 144        | 0.359         | <b>17*</b> | 0.363        | 270   | 0.300    | 41    | 0.315  | 540   | 0.267* | 152   |
| ecoli      | <b>0.060*</b> | 25         | 0.065         | 48         | 0.113         | <b>12*</b> | 0.113        | 169   | 0.095    | 39    | 0.095  | 336   | 0.101  | 42    |
| glass      | 0.187         | 38         | 0.187         | 43         | <b>0.159*</b> | <b>29*</b> | 0.290        | 110   | 0.234    | 37    | 0.243  | 214   | 0.187  | 64    |
| heart      | 0.156         | 17         | <b>0.148*</b> | 27         | <b>0.148*</b> | <b>14</b>  | 0.170        | 135   | 0.148*   | 12*   | 0.156  | 270   | 0.156  | 87    |
| hepatitis  | <b>0.156*</b> | <b>12*</b> | 0.182         | 65         | 0.182         | 18         | 0.195        | 78    | 0.182    | 14    | 0.208  | 156   | 0.182  | 33    |
| horse      | 0.158         | <b>31*</b> | 0.163         | 32         | <b>0.136*</b> | 33         | 0.196        | 184   | 0.179    | 34    | 0.185  | 368   | 0.201  | 85    |
| ionosphere | 0.131         | <b>31*</b> | 0.154         | 71         | <b>0.097*</b> | 45         | 0.120        | 176   | 0.126    | 37    | 0.120  | 352   | 0.097* | 43    |
| letter:ab  | 0.016         | 26         | <b>0.008*</b> | 104        | 0.012         | <b>22</b>  | 0.016        | 500   | 0.018    | 16*   | 0.019  | 1000  | 0.014  | 67    |
| monks      | <b>0.245</b>  | <b>18*</b> | <b>0.245</b>  | 61         | <b>0.245</b>  | 50         | 0.329        | 216   | 0.287    | 47    | 0.347  | 432   | 0.208* | 96    |
| optdigits  | 0.090         | <b>25*</b> | <b>0.066*</b> | 147        | 0.088         | 77         | 0.098        | 500   | 0.087    | 58    | 0.142  | 1000  | 0.096  | 77    |
| pima       | 0.263         | 32         | 0.258         | 36         | <b>0.247*</b> | <b>15*</b> | 0.250        | 384   | 0.253    | 17    | 0.263  | 768   | 0.260  | 254   |
| titanic    | <b>0.220*</b> | <b>13*</b> | <b>0.220*</b> | 15         | 0.227         | 49         | 0.222        | 500   | 0.220*   | 16    | 0.220* | 1000  | 0.227  | 234   |
| vote       | <b>0.051*</b> | <b>33*</b> | 0.055         | 110        | 0.055         | 37         | 0.055        | 218   | 0.055    | 41    | 0.060  | 436   | 0.051* | 54    |
| wine       | <b>0.034</b>  | 27         | <b>0.034</b>  | 29         | 0.045         | <b>16*</b> | 0.045        | 89    | 0.045    | 19    | 0.022* | 178   | 0.056  | 30    |
| yeast      | 0.279         | <b>33*</b> | <b>0.277*</b> | 65         | 0.288         | 88         | 0.278        | 502   | 0.282    | 80    | 0.299  | 1000  | 0.278  | 337   |
| zoo        | 0.059         | 24         | 0.059         | 27         | <b>0.000*</b> | <b>18</b>  | 0.098        | 50    | 0.000*   | 23    | 0.039  | 100   | 0.137  | 12*   |

Table 2: Performance and sparsity comparison of CqBoost, MDBoost, LPBoost, CG-Boost, AdaBoost, MinCq and SVM, using RBF kernel functions as weak classifiers. A bold value indicates that the risk (or number of chosen columns) is the lowest among the column generation algorithms. A star indicates that the risk is the lowest among all seven algorithms.

In this setting, we observe that CqBoost, MDBoost and LPBoost show a very similar performance. We also notice that MDBoost slightly outperforms CqBoost with 10 wins and 7 losses, but with a sign test  $p$ -value of only 0.31, which is not statistically significant.

In terms of sparsity, we observe that CqBoost still reaches its goal of outputting significantly sparser solutions than MinCq, while keeping a similar performance. Using RBF kernels as voters, as opposed to the results using decision stumps, CqBoost produces slightly sparser solutions than LPBoost, even if the latter has a  $L_1$ -norm regularization term on the weight vector that directly penalizes dense solutions.
